# Supplementary material for: Plasmon-enhanced catalysis of photo-induced charge transfer from TCNQF4− to TCNQF42−
Source: Royal Society of Chemistry journal article supplement (doi:10.1039/c3tc32270j), 2013-12-10
Supplement: c3tc32270j.pdf [file c3tc32270j.pdf]

## Electronic Supplementary Information (ESI)

### Plasmon-Enhanced Catalysis of Photo-Induced Charge Transfer from TCNQF<sub>4</sub><sup>-</sup> to TCNQF<sub>4</sub><sup>2-</sup>

Jing Wang,<sup>a</sup> Weiqing Xu,<sup>a</sup> Jinxia Wu,<sup>a</sup> Guangtao Yu,<sup>b</sup> Xianghua Zhou,<sup>a</sup> and Shuping Xu<sup>a\*</sup>

<sup>a</sup>State Key Laboratory of Supramolecular Structure and Materials, Jilin University, Changchun  
130012, P. R. China

<sup>b</sup> State Key Laboratory of Theoretical and Computational Chemistry, Jilin University, 2 Liutiao Road,  
Changchun 130023, P. R. China.

\*Corresponding author

Email: xusp@jlu.edu.cn

Tel: 86-431-85168505

Fax: 86-431-85193421

## 1. Experimental and Calculated Raman Spectra of TCNQF<sub>4</sub>, Ag-TCNQF<sub>4</sub> and Ag<sub>2</sub>-TCNQF<sub>4</sub>.

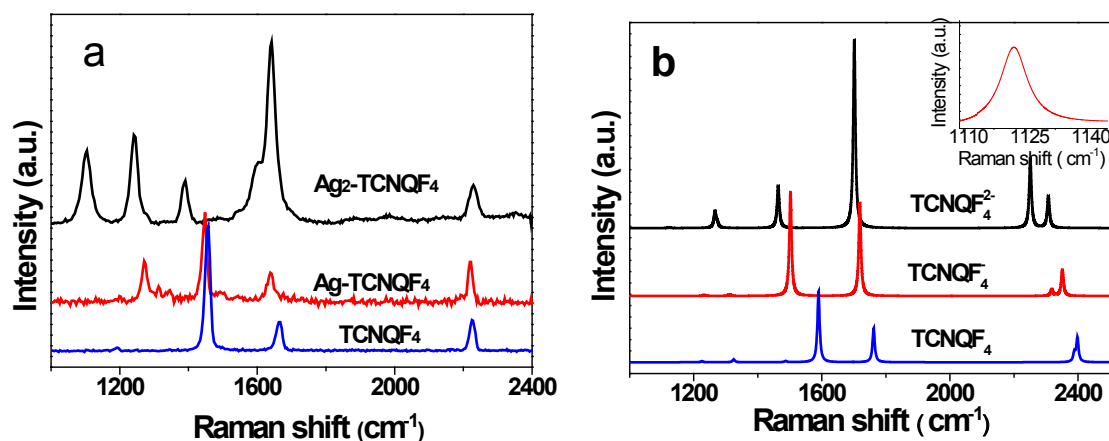

Figure S1. The Raman spectra of TCNQF<sub>4</sub>, Ag-TCNQF<sub>4</sub> and Ag<sub>2</sub>-TCNQF<sub>4</sub> from a) experiment and b) calculation. The insert shows the Raman vibration mode of TCNQF<sub>4</sub><sup>2-</sup> at 1122cm<sup>-1</sup> by magnification.

Table S1. Raman shift assignments of TCNQF<sub>4</sub><sup>-</sup> and TCNQF<sub>4</sub><sup>2-</sup>.

| Raman shift (cm <sup>-1</sup> ) |                 |                                 |                 |                                                      |                  | Assignment                         |
|---------------------------------|-----------------|---------------------------------|-----------------|------------------------------------------------------|------------------|------------------------------------|
| TCNQF <sub>4</sub>              |                 | TCNQF <sub>4</sub> <sup>-</sup> |                 | TCNQF <sub>4</sub> <sup>2-</sup> (cm <sup>-1</sup> ) |                  |                                    |
| Experiment                      | Calculation     | Experiment                      | Calculation     | Experiment                                           | Calculation      |                                    |
| 2226(m)                         | 2398(m),2388(w) | 2221(m)                         | 2351(m),2317(m) | 2207-2259(m)                                         | 2307(m), 2250(m) | ν C≡N, δ C≡N                       |
| 1665(m)                         | 1761(m)         | 1638(s)                         | 1718(s)         | 1642(s)                                              | 1701(s)          | ν C=C ring                         |
| 1454(s)                         | 1589(s)         | 1446(s)                         | 1501(s)         | 1390(s)                                              | 1463(m)          | ν C-CN wing                        |
|                                 | 1324(w)         |                                 | 1312(w)         | 1240(m)                                              | 1266(w)          | νC6-C1-C7 deformation stretch      |
|                                 | 1164(vw)        |                                 | 1145(vw)        | 1104(m)                                              | 1122(vw)         | νC1-C2-C3 ring deformation stretch |

To identify the Raman bands of Ag-TCNQF<sub>4</sub> and Ag<sub>2</sub>-TCNQF<sub>4</sub>, we took TCNQF<sub>4</sub><sup>-</sup> and TCNQF<sub>4</sub><sup>2-</sup> as models to compute the Raman spectra of Ag-TCNQF<sub>4</sub> and Ag<sub>2</sub>-TCNQF<sub>4</sub>, respectively, at the CAM-B3LYP method with the 6-311+G(d) basis set. For comparison, the Raman spectrum of TCNQF<sub>4</sub> was calculated. All the calculations were carried out by using the GAUSSIAN 09 program package.

The calculated Raman spectra are shown in Figure S1 of ESI. Via the comparison of experimental and calculated spectra, we can find that only very little band shifts appear, owing to simplified structure models we used and ideal medium surrounding settings. Most calculated and experimental Raman band positions are highly

coincident for both Ag-TCNQF<sub>4</sub> and Ag<sub>2</sub>-TCNQF<sub>4</sub>. So, we can infer that the product of the photo-induced charge transfer is Ag<sub>2</sub>-TCNQF<sub>4</sub>.
